# Supplementary material
Source: publisher figshare collection journal article supplement (https://acs.figshare.com/ndownloader/files/18517613)
Supplement: Supplementary file 1 [file 18517613]

Archive with 6 entries (6 files):
- info.xml
- jz9b02335_high_quality.mp4
- 1016.pdf
- 1700.pdf
- 1802.pdf
- jz9b02335.pdf
