# Supplementary material
Source: publisher figshare collection journal article supplement (https://acs.figshare.com/ndownloader/files/18517613)
Supplement: Supplementary file 1 [file 18517613 › 1016.pdf]

Permission Request Form for Use of *Individual and/or Group Photos*  
in *ACS LiveSlides* from Copyright Owners/Publishers/Photographers  
Other Than ACS

Date: 11/1/19

To: ACS Livedives  
Publisher's/Copyright Owner's Contact Information

ACS Pbs Multimedia @ acs.org

Publisher's/Copyright Owner's Email Address

From: Shunlong Zhang  
Your Name and Complete Mailing Address

Zhejiang University, Hangzhou 310027, China

No. 38 Zheda Road  
Your Phone Number Including Country and City Codes

(86) 18317129785 ; 310027  
Your Email Address

zhangshunlong@zju.edu.cn  
Your Specific Deadline Date

I am preparing an *ACS LiveSlides* entitled:

Vapor Deposition Red Phosphorus to Prepare Nitrogen-Doped Ti<sub>3</sub>C<sub>2</sub>T<sub>x</sub> MXenes Composites for Lithium-Ion Batteries  
to appear with  
The Journal of Physical Chemistry Letters, DOI: 10.1021/acs.jpclett.9b02333  
Title of ACS Publication and DOI

which is published by the American Chemical Society, a not-for-profit membership society and a STM signatory.

I would appreciate your permission to use the following material in all formats including but not limited to print, microform, electronic, and/or CD-ROM from the following reference:

**Individual Photographs of the Following Individuals:**

**Collective Photograph (s) representing the following groups:**

If you, the photographer, have a required **credit line**, please include it below:

For your convenience, you may sign and date the bottom of this letter to indicate your agreement. Please return this form to me at the above email address, by the above **deadline date** (if given above). Thank you.

Agreed: Shunlong Zhang  
Publisher's/Copyright Owner's Signature or Stamp

Date: 11/1/19  
Date

**SIGN HERE**

Submit completed and signed form with your signed *ACS LiveSlides* Video Release. 7/25/16

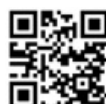

由 扫描全能王 扫描创建
