# Supplementary material
Source: publisher figshare collection journal article supplement (https://acs.figshare.com/ndownloader/files/18517613)
Supplement: Supplementary file 1 [file 18517613 › 1802.pdf]

# Permission Request Form: for Use of Previously Published Figures/Tables/Artwork/Photos in ACS LiveSlides from Copyright Owners/Publishers/Photographers Other Than ACS.

If you have questions regarding this form, or if you have receive permissions from publishers via Rightslink, please contact [ACSPubsMultimedia@acs.org](mailto:ACSPubsMultimedia@acs.org)

Date: 11/1/19

To: ACS LIVESLIDES  
Publisher's/Copyright Owner's Contact Information

ACSPubs/Multimedia@acs.org

Publisher's/Copyright Owner's Email Address

From: Shunlong Zhang  
Your Name and Complete Mailing Address

Zhejiang University, Hangzhou 310027, China

No. 38 Zheda Road.

Your Phone Number Including Country and City Codes

(86) 18317129985 310027 Hangzhou

Your Email Address

zhangshunlong@zju.edu.cn

Your Specific Deadline Date

11/5/19

I am preparing an ACS LiveSlides entitled:

Vapor Deposition Red Phosphorus to Prepare Nitrogen-Doped Ti<sub>3</sub>C<sub>2</sub>Tx MXenes Composites for Lithium-Ion Batteries.

to appear with

The Journal of Physical Chemistry Letters DOI: 10.1021/acs.jpclett.9b02335

Title of ACS Publication and DOI

which is published by the American Chemical Society, a not-for-profit membership society and a STM signatory.

I would appreciate your permission to use the following material in all formats including but not limited to print, microform, electronic, and/or CD-ROM from the following reference:

From a journal or magazine:

Publication Title Year Vol. No. Page(s) Material to be used

The Journal of Physical Chemistry Letters, 2019, 10, 6446-6454

Vapor Deposition Red Phosphorus to Prepare Nitrogen-Doped Ti<sub>3</sub>C<sub>2</sub>Tx MXenes Composites for Lithium-Ion Batteries.

From a book: include book title, series name and number, year, page(s), book editor(s) name(s), chapter author's name(s), and material to be used, such as Figs. 2 & 3, full text, etc.

If you have a required credit line, please include it below:

For your convenience, you may sign and date the bottom of this letter to indicate your agreement. Please return this form to me at the above email address, by the above deadline date (if given above). Thank you.

Agreed: Shunlong Zhang  
Publisher's/Copyright Owner's Signature or Stamp

Date: 11/1/19

Date

SIGN HERE

Submit completed and signed form with your signed ACS LiveSlides Video Release.

7/25/16

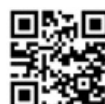

由 扫描全能王 扫描创建
