# Supplementary material
Source: publisher figshare collection journal article supplement (https://acs.figshare.com/ndownloader/files/18517613)
Supplement: Supplementary file 1 [file 18517613 › info.xml]

<presentation>
	<article>
		<title>Vapor Deposition Red Phosphorus to Prepare Nitrogen-Doped Ti3C2Tx MXenes Composites for Lithium-ion Batteries</title>
		<doi>10.1021/acs.jpclett.9b02335</doi>
		<copyright>American Chemical Society</copyright>
		<narrator>Shunlong Zhang</narrator>
		<contact>Shunlong Zhang</contact>
		<contact-email>zhangshunlong@zju.edu.cn</contact-email>
		<author-list>
			<author>Wei-Qiang Han</author>
		</author-list>
	</article>
	<slides height-width-ratio=".75">
		<slide audio-time="40">
			<subtitle/>
		</slide>
		<slide audio-time="110">
			<subtitle/>
		</slide>
		<slide audio-time="60">
			<subtitle/>
		</slide>
		<slide audio-time="40">
			<subtitle/>
		</slide>
		<slide audio-time="45">
			<subtitle/>
		</slide>
		<slide audio-time="49">
			<subtitle/>
		</slide>
		<slide audio-time="66">
			<subtitle/>
		</slide>
	</slides>
	<audio duration="410"/>
</presentation>
